# Supplementary material for: Rubber-based carbon electrode materials derived from dumped tires for efficient sodium-ion storage
Source: Royal Society of Chemistry journal article supplement (doi:10.1039/c8dt00504d), 2018-01-01
Supplement: c8dt00504d1.pdf [file c8dt00504d1.pdf]

---

# Rubber-Based Carbon Electrode Materials Derived from Dumped Tires for Efficient Sodium-ion Storage

Zhen-Yue Wu, Chao Ma, Yu-Lin Bai, Yu-Si Liu, Shi-Feng Wang, Xiao Wei, Kai-Xue Wang\* and Jie-Sheng Chen

Shanghai Electrochemical Energy Devices Research Center, School of Chemistry and Chemical Engineering, Shanghai Jiao Tong University, Shanghai 200240, P. R. China

\*Corresponding author: [k.wang@sjtu.edu.cn](mailto:k.wang@sjtu.edu.cn)

**Table S1** Results of ICP, EA of the WRC.

| wt% |       |    |      |    |      |        |      |
|-----|-------|----|------|----|------|--------|------|
| C   | 83.10 | Zn | 6.58 | Na | 0.26 | Sn     | 0.15 |
| H   | 1.31  | Ca | 0.73 | Al | 0.24 | Mg     | 0.11 |
| O   | 2.33  | Si | 0.54 | K  | 0.18 | N      | 0.26 |
| S   | 3.35  | Fe | 0.39 | P  | 0.17 | others | 0.28 |

others\* including Co, Cu, Ti, Pb, Ni, B, As, Mn, Se, Cr, Mo, Sr, Cd, none of these elements' content more than 0.1 wt%.

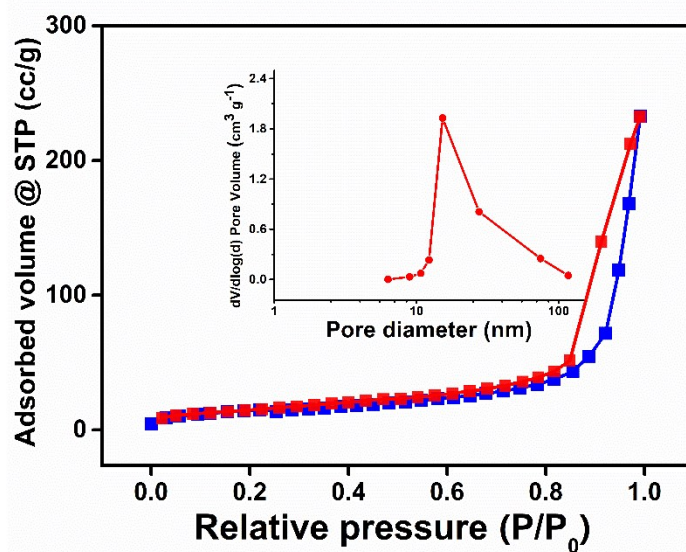

Fig. S1 N<sub>2</sub> adsorption/desorption isotherms of the WRC-P, insert is the corresponding pore size distribution curve of WRC-P.

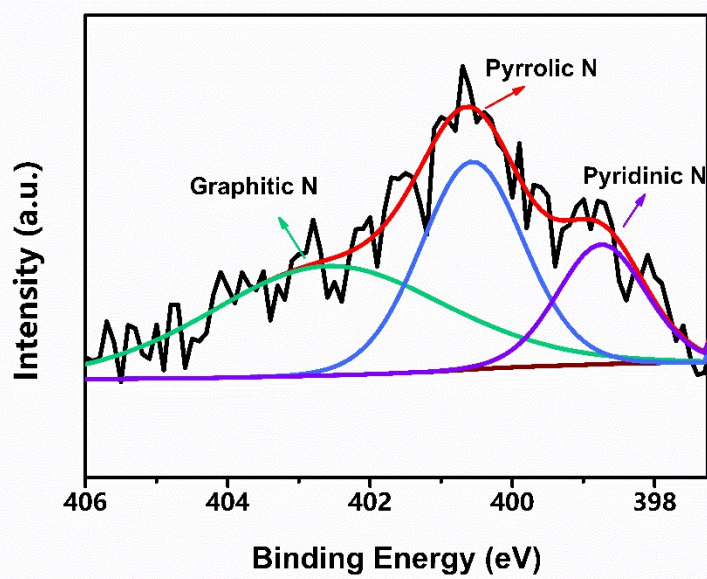

Fig. S2 N 1s XPS spectrum of WRC.

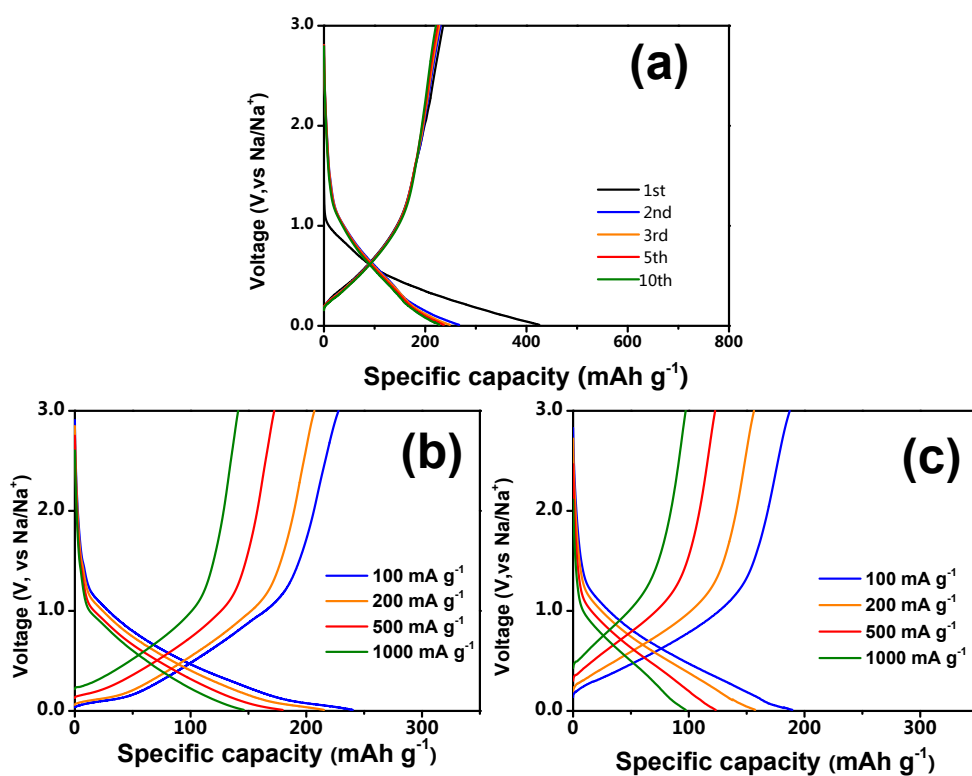

Fig. S3 (a) Discharge/charge profiles for WRC-P at 50 mA/g, discharge/charge profiles of (b) WRC and (c) WRC-P at different rates.
